# Supplementary material for: Diffusion Retardation by Binding of Tobramycin in an Alginate Biofilm Model
Source: PubMed Central journal article supplement (PMC4839563; doi:10.1371/journal.pone.0153616), 2016-04-21
Supplement: pone.0153616.s001.pdf [file pone.0153616.s001.pdf]

# Check of calibration

ba020150430\_bao20150318\_Diffu

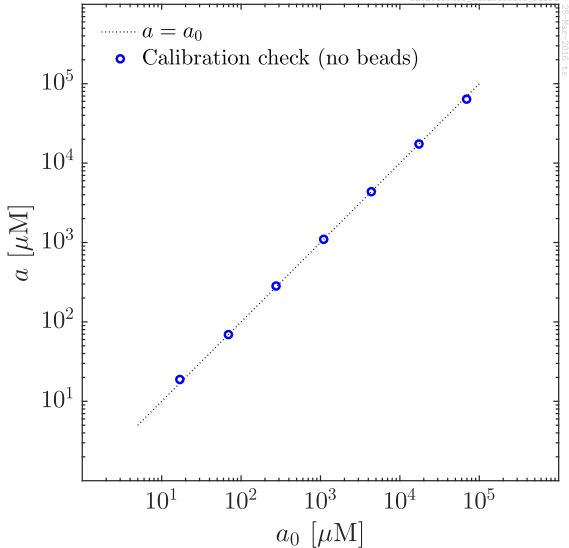

2015-Mar-2016 ts
